# Supplementary material
Source: MDPI journal article supplement (https://www.mdpi.com/2571-9408/6/7/272)
Supplement: s1 [file s1]

### Supplementary Materials:

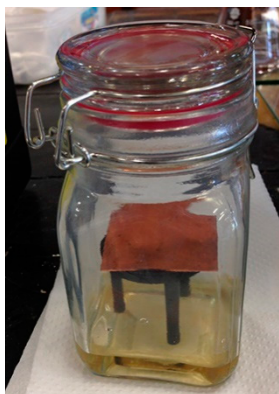

Figure S1: Image of the experiment of synthesis of antiquity *viride salsum* recipe (TEO)

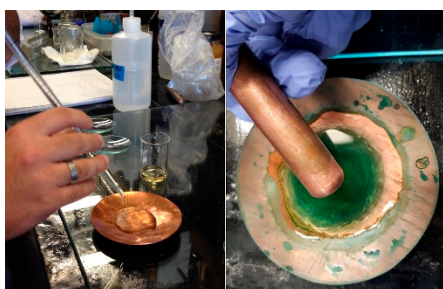

Figure S2: Image of the experiment the reproduction of cardenillo vermicular recipe (CV). Left: Mixture of sodium chloride, alum and vinegar in a copper bowl. Right: first crystals of the reaction in the copper bowl.

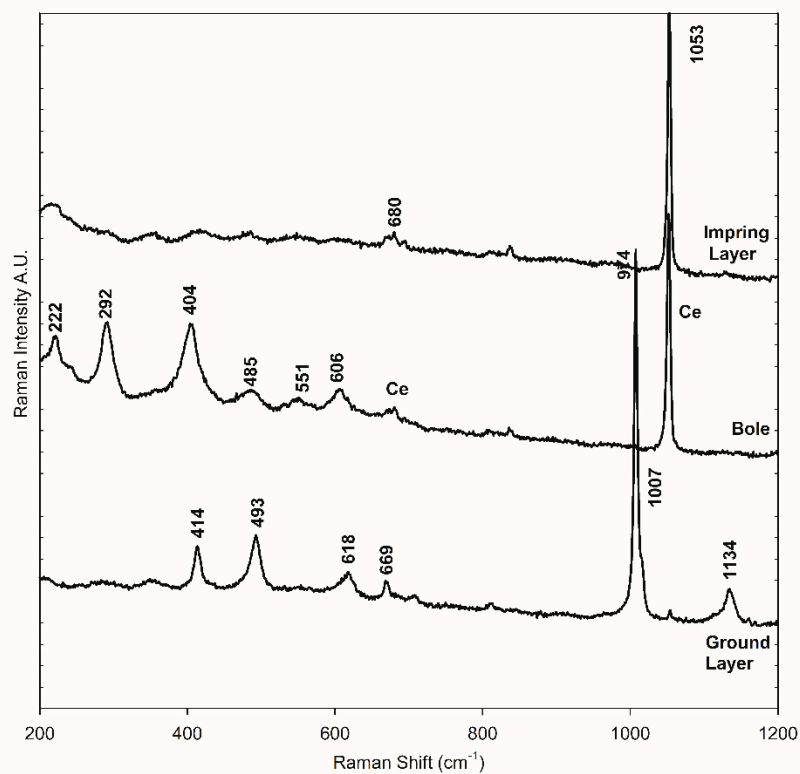

Figure S3: Raman spectra of the ground layer, bole and priming layer in the cross-section of the green sample ANC05.

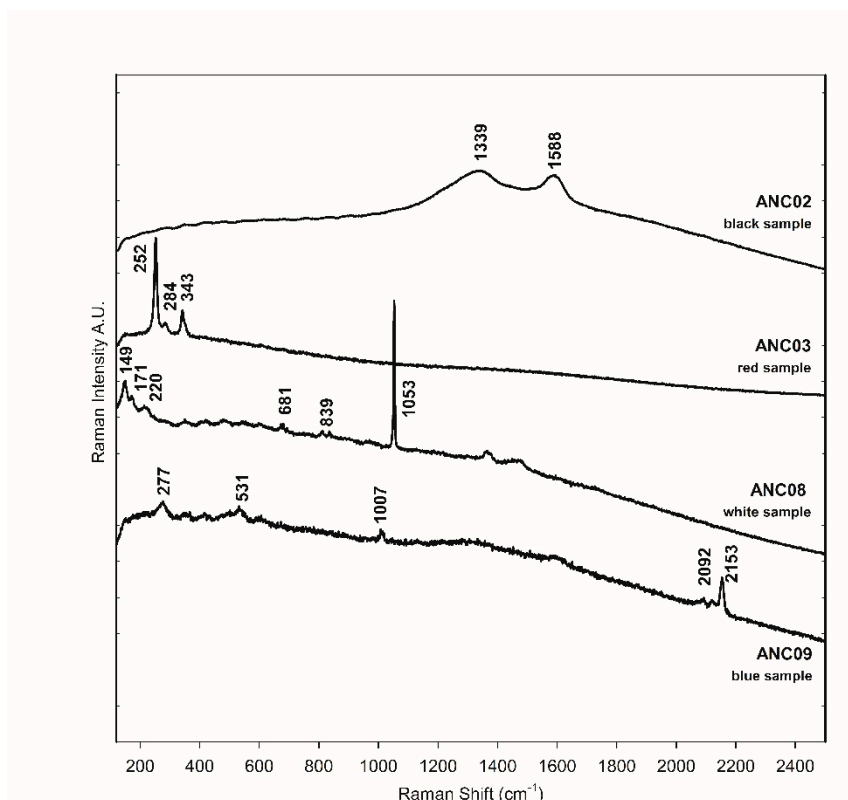

Figure S4: Raman spectra of samples of other colours

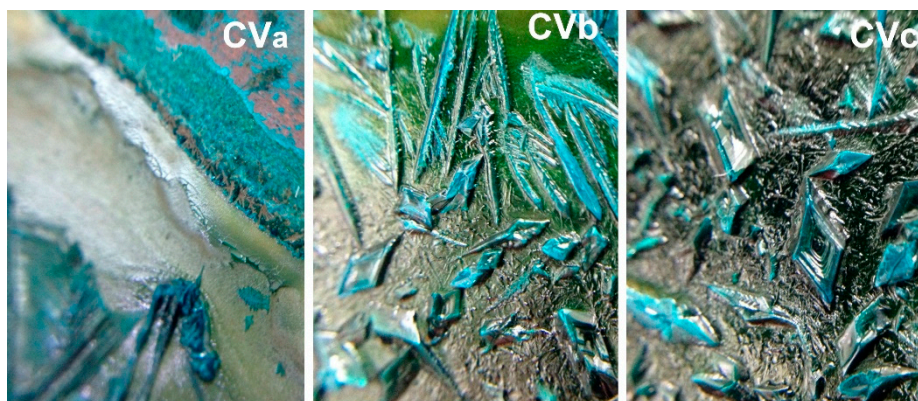

Figure S5: Image of the scratched crystals of the product of the *Cardenillo Vermicular* recipe (CV) on the copper plate.

| sample  | ANC07   |         | sample  | ANC10   |         |
|---------|---------|---------|---------|---------|---------|
| Element | Weight% | Atomic% | Element | Weight% | Atomic% |
| O K     | 52.88   | 75.85   | O K     | 49.00   | 70.76   |
| Al K    | 1.76    | 1.49    | Al K    | 4.87    | 4.17    |
| Si K    | 3.31    | 2.71    | Si K    | 8.17    | 6.72    |
| S K     | 2.17    | 1.55    | S K     | 2.96    | 2.13    |
| Cl K    | 12.21   | 7.91    | Cl K    | 8.55    | 5.57    |
| K K     | 0.96    | 0.56    | K K     | 1.06    | 0.62    |
| Ca K    | 0.84    | 0.48    | Ca K    | 3.17    | 1.83    |
| Fe K    | 2.01    | 0.83    | Fe K    | 2.11    | 0.87    |
| Cu K    | 23.86   | 8.62    | Cu K    | 20.11   | 7.31    |
| Totals  | 100.00  |         | Totals  | 100.00  |         |

Table S1: elemental composition of the ANC07 and ANC10 green layer samples.

|    | CV a  | CV b  | CV c  |
|----|-------|-------|-------|
| C  | 46.49 | 38.88 | 43.24 |
| O  | 47.53 | 52.75 | 52.77 |
| Cu | 5.58  | 7.85  | 3.69  |
| Fe | 0.24  | 0.20  | 0.09  |
| Si | 0.07  | 0     | 0     |
| Al | 0.04  | 0.10  | 0.09  |
| Cl | 0.03  | 0.14  | 0.06  |
| K  | 0.02  | 0.04  | 0.04  |
| S  | 0     | 0.04  | 0.03  |

Table S2: elemental composition (Atomic %) of the different crystals of the product of the *Cardenillo Vermicular* recipe (CV)
